# Supplementary material for: Monoacylglycerol Lipase Inhibitor JZL184 Improves Behavior and Neural Properties in Ts65Dn Mice, a Model of Down Syndrome
Source: PubMed Central journal article supplement (PMC4256450; doi:10.1371/journal.pone.0114521), 2014-12-04

Figure S2A. Blot 1 (Ts Veh vs. 2N Veh) after App antibody

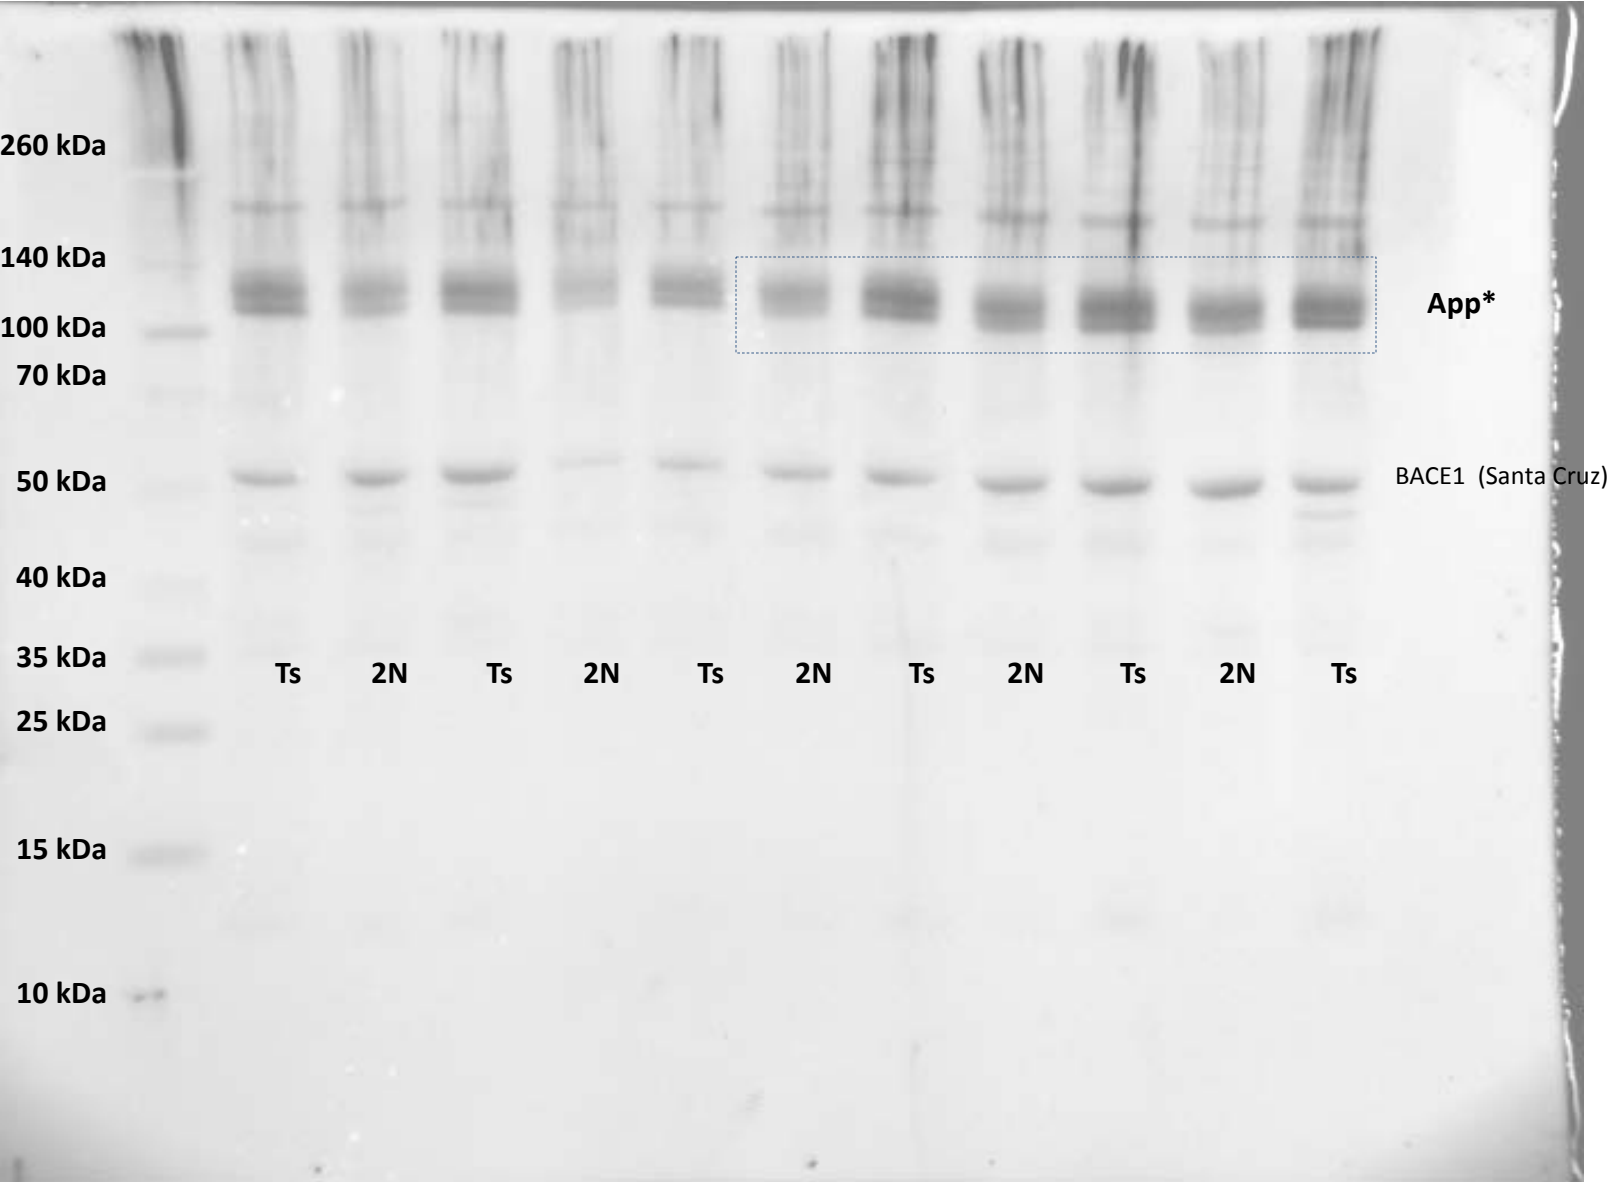

Figure S2B. Blot 1 (Ts Veh vs. 2N Veh) after App +  $\beta$ Actin antibodies

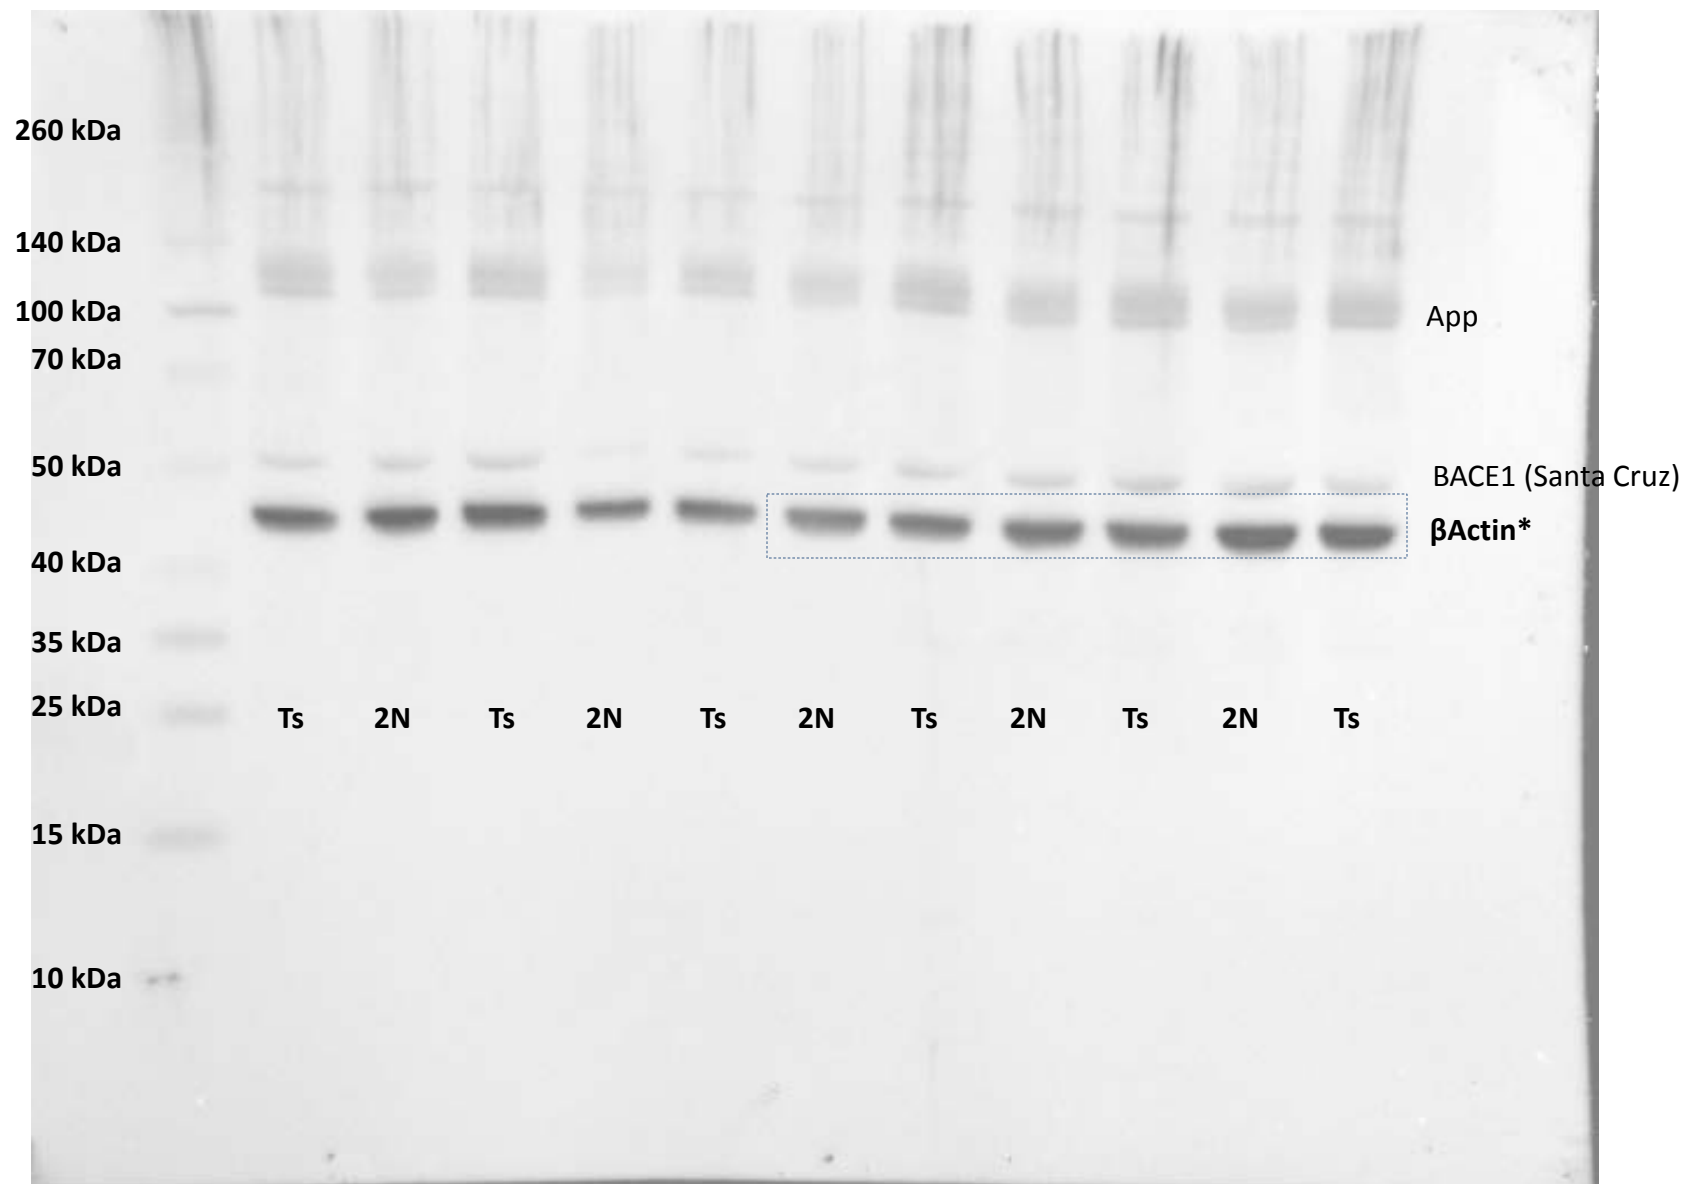



Figure S2D. Blot 2 (2N Veh vs. 2N JZL) after App antibody

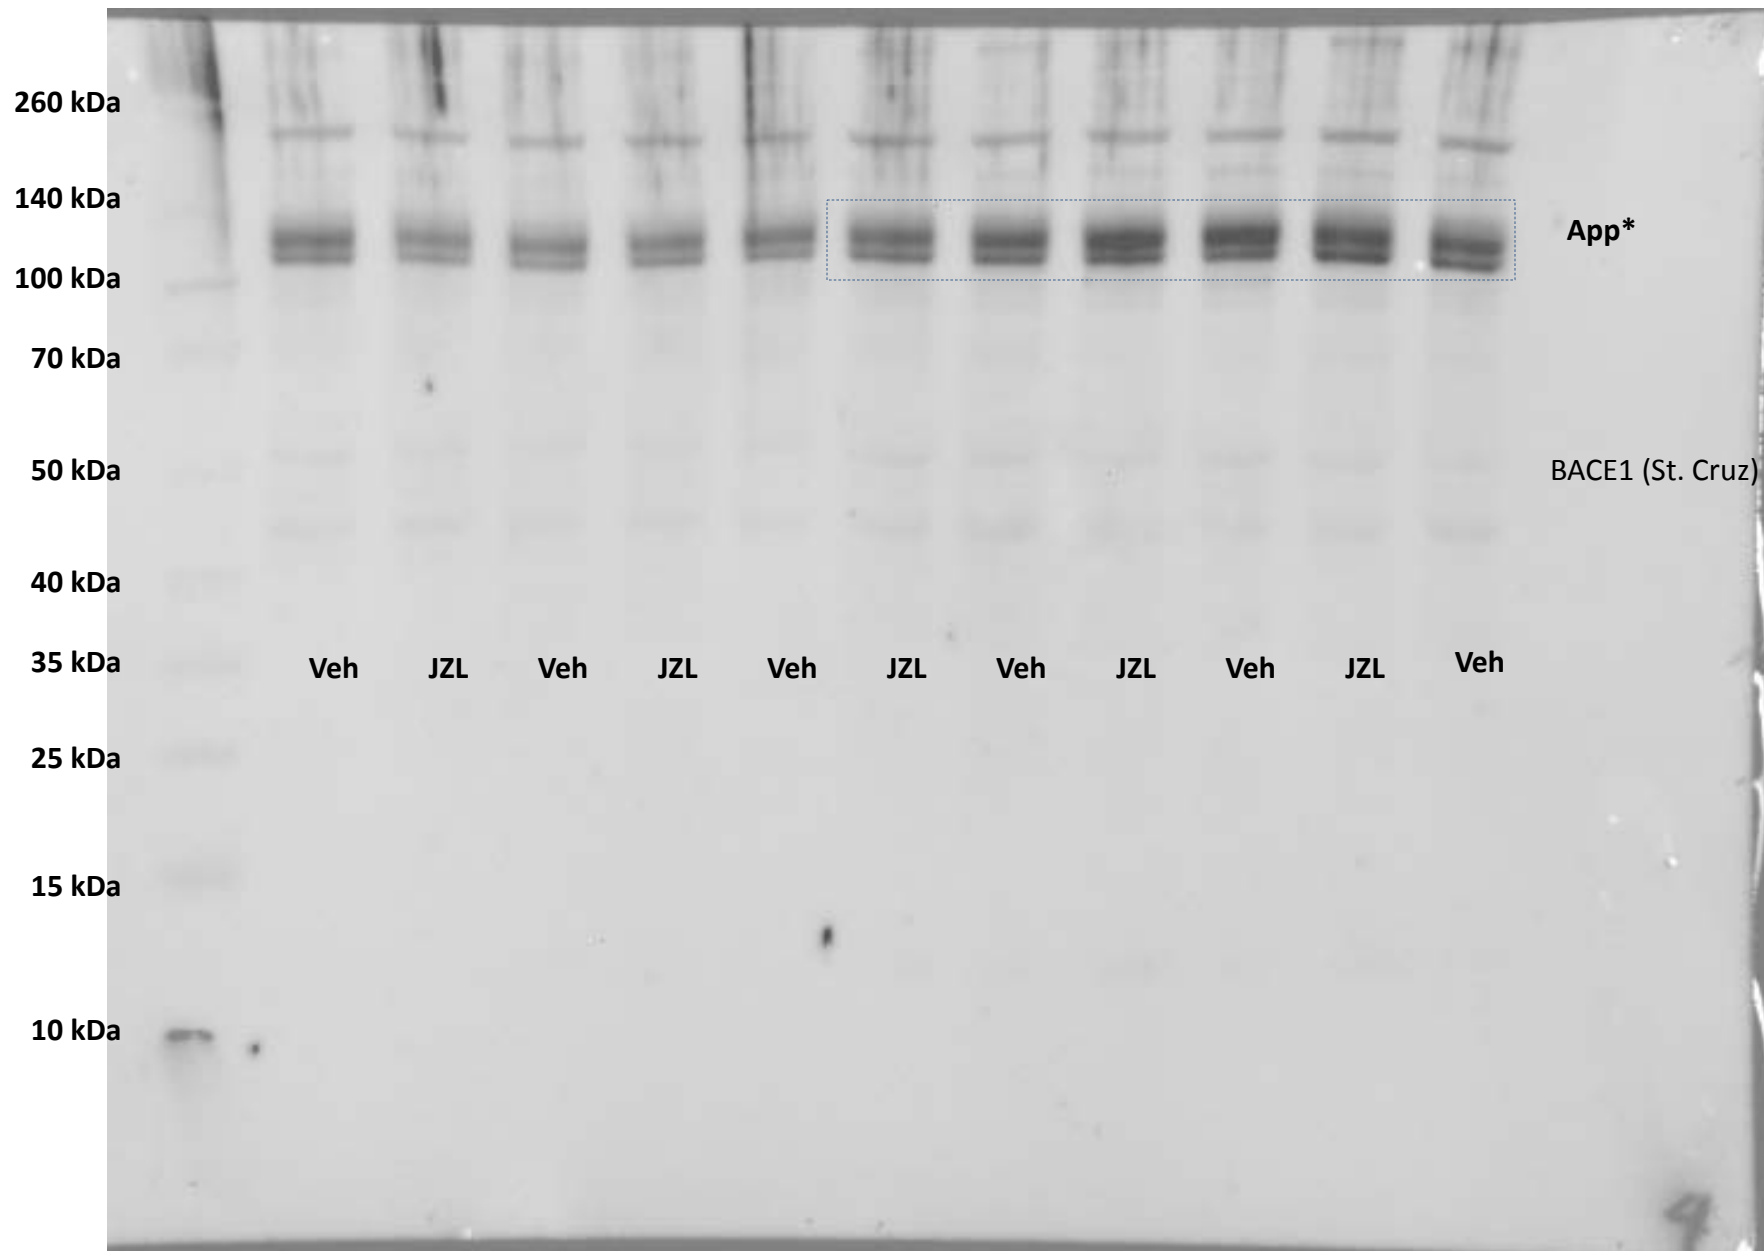

Figure S2E. Blot 2 (2N Veh vs. 2N JZL) after App+  $\beta$ Actin antibodies

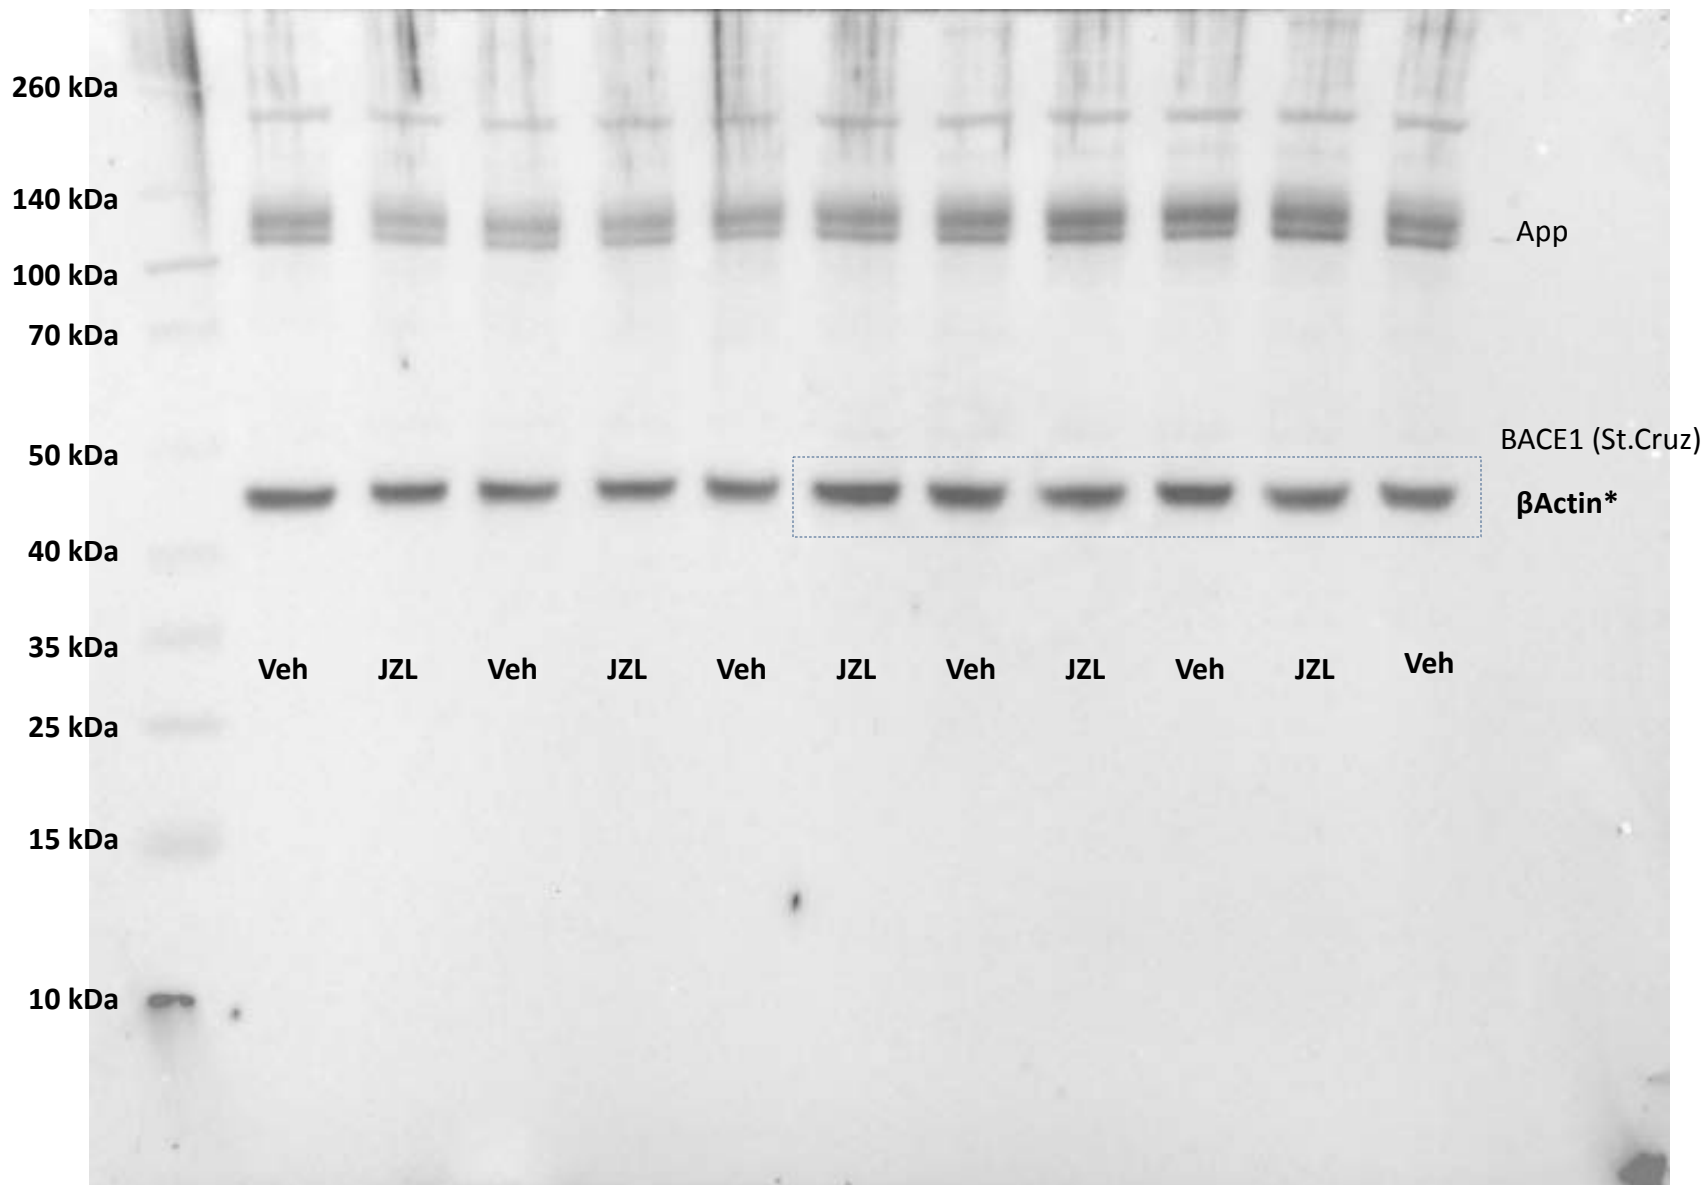

Figure S2F. Blot 2 (2N Veh vs. 2N JZL) after App+  $\beta$ Actin antibodies

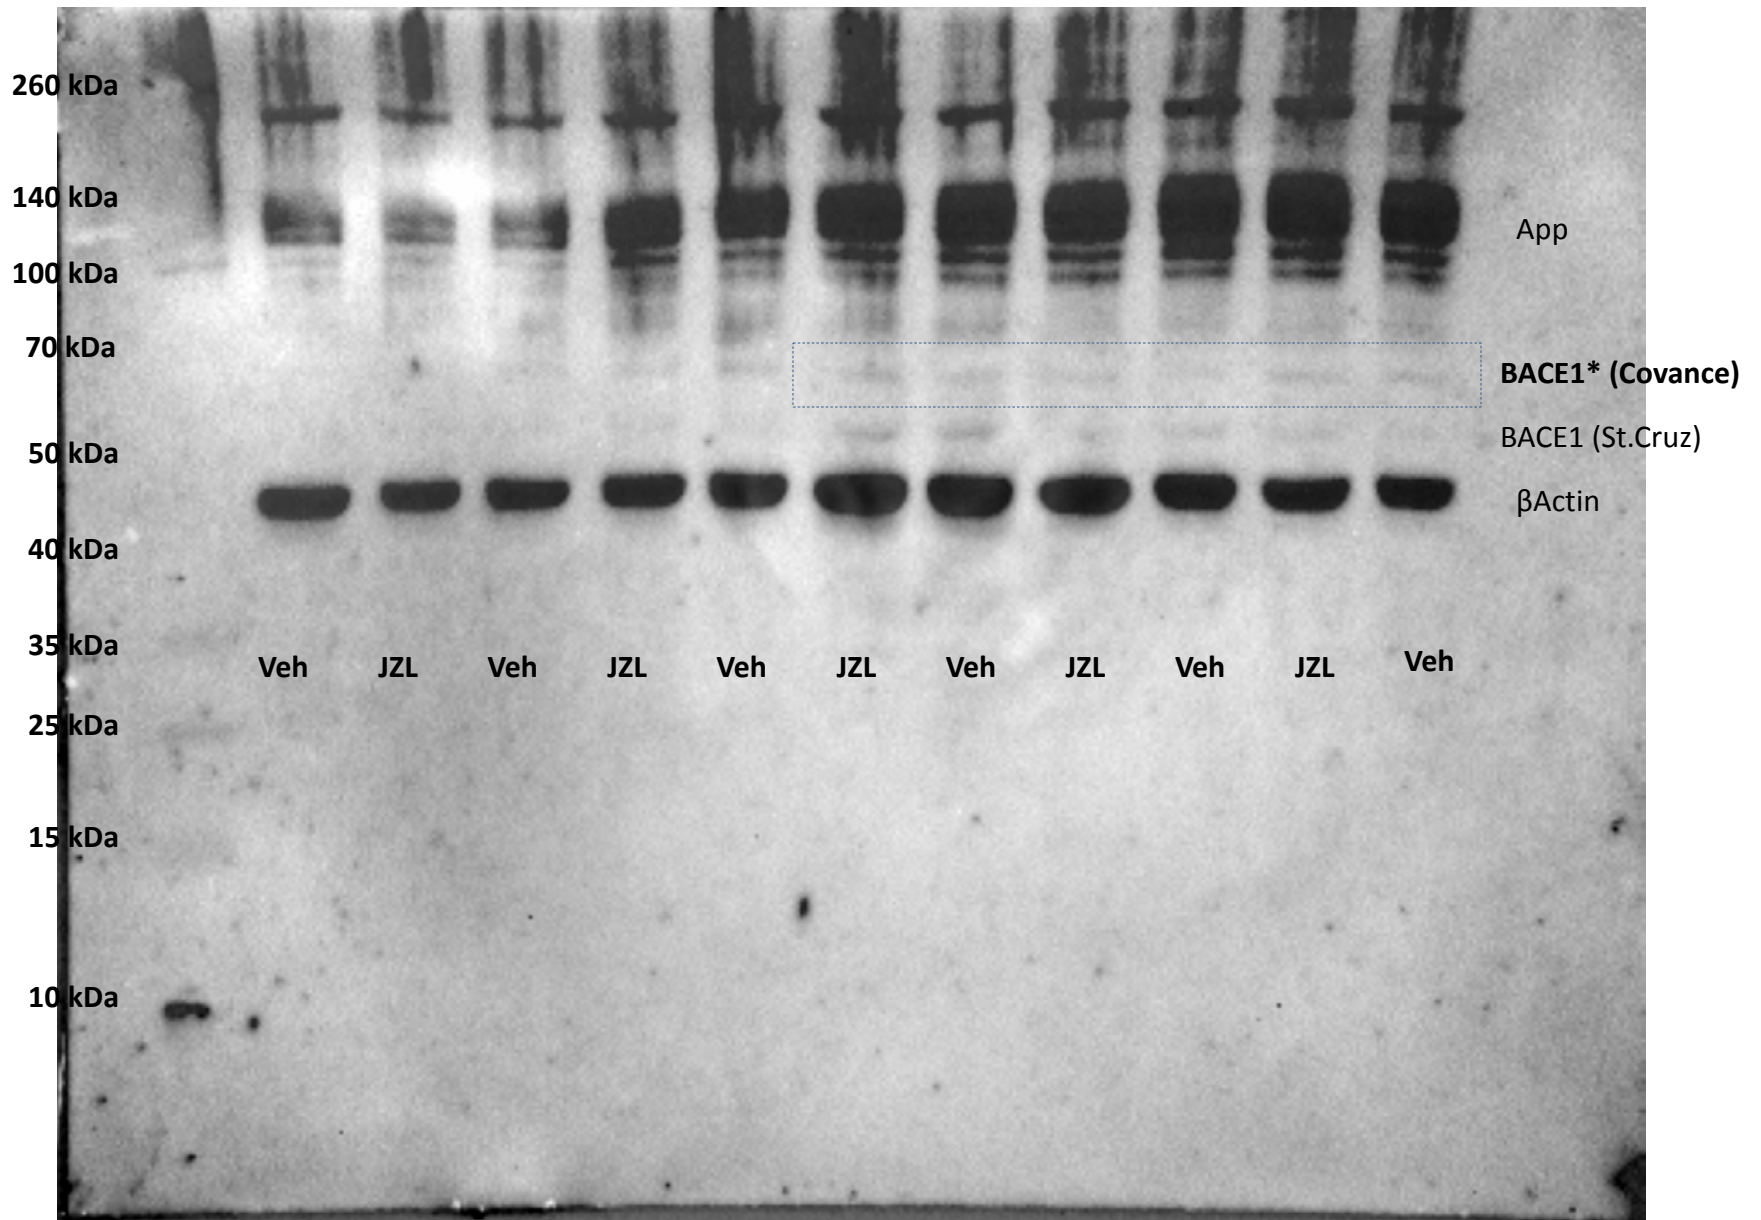

Figure S2G. Blot 3 (Ts Veh vs. Ts JZL) after App antibody

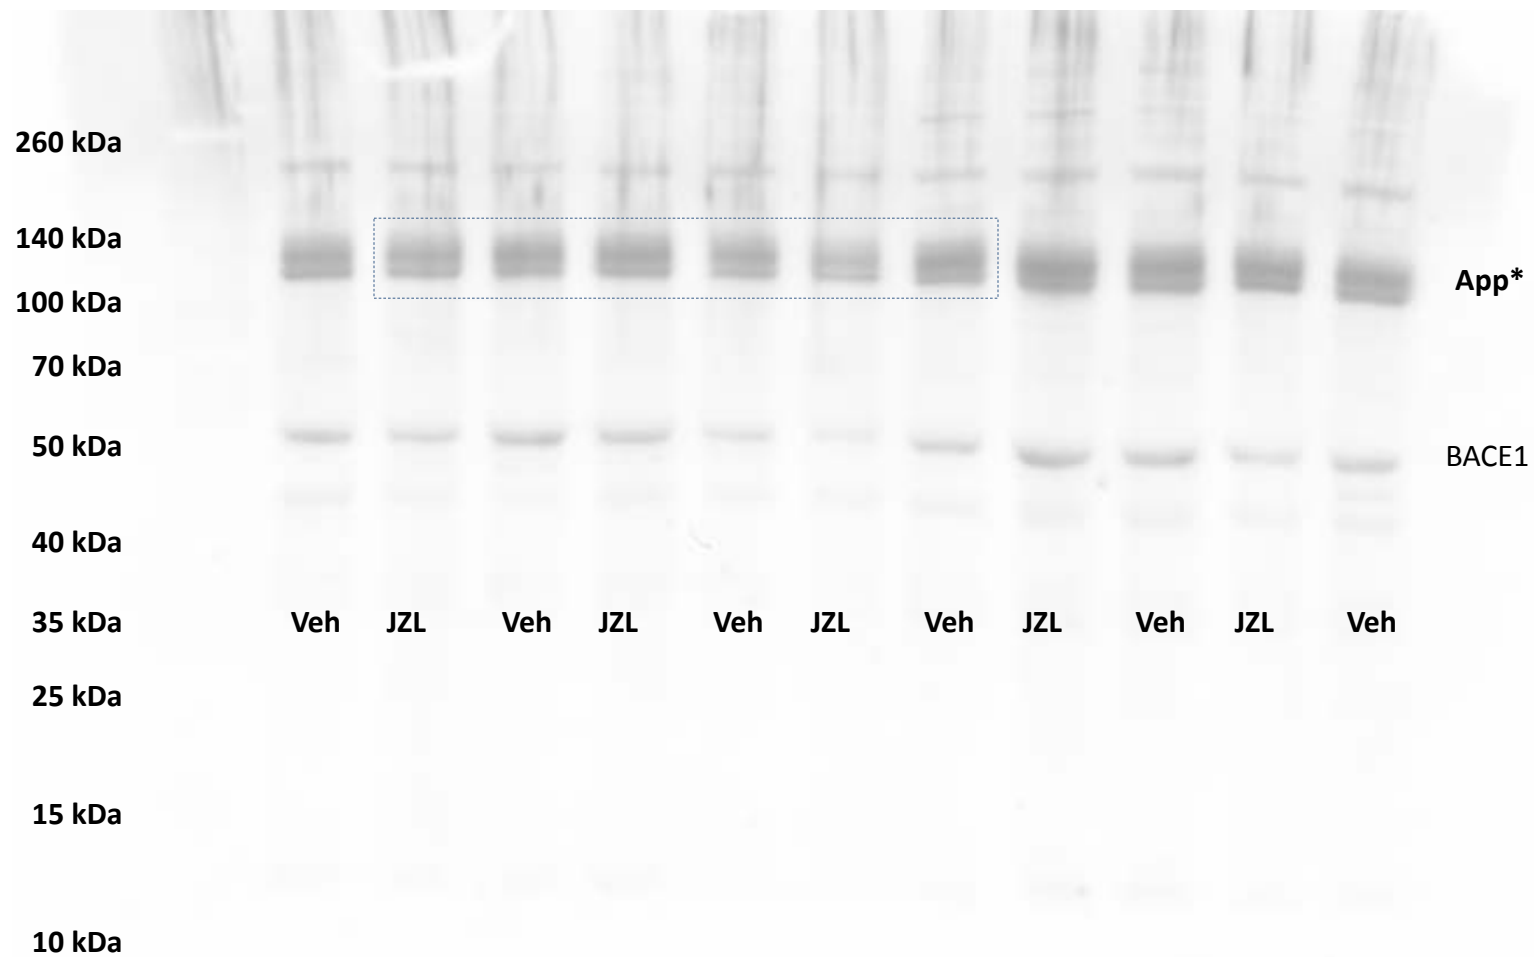

Figure S2H. Blot 3 (Ts Veh vs. Ts JZL) after App +  $\beta$ Actin antibodies

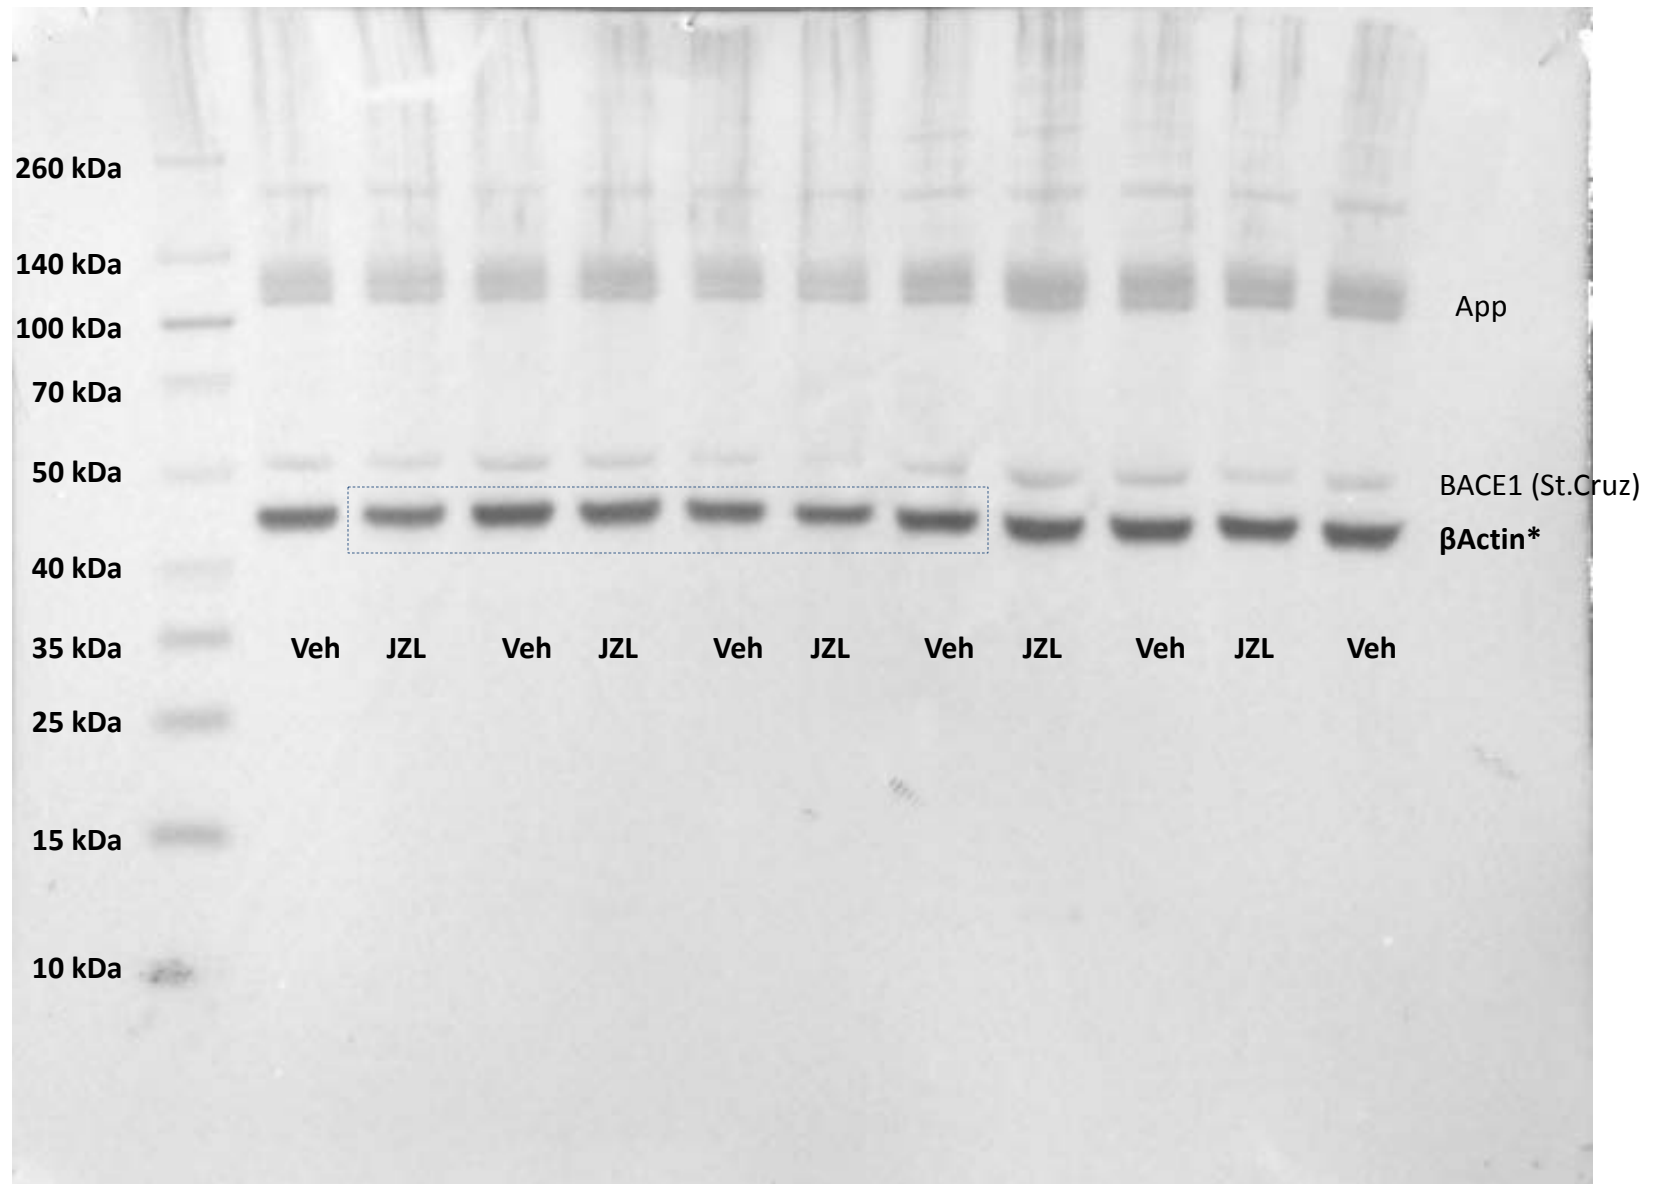



Figure S2I. Blot 3 (Ts Veh vs. Ts JZL) after App+  $\beta$ Actin + BACE1 antibodies

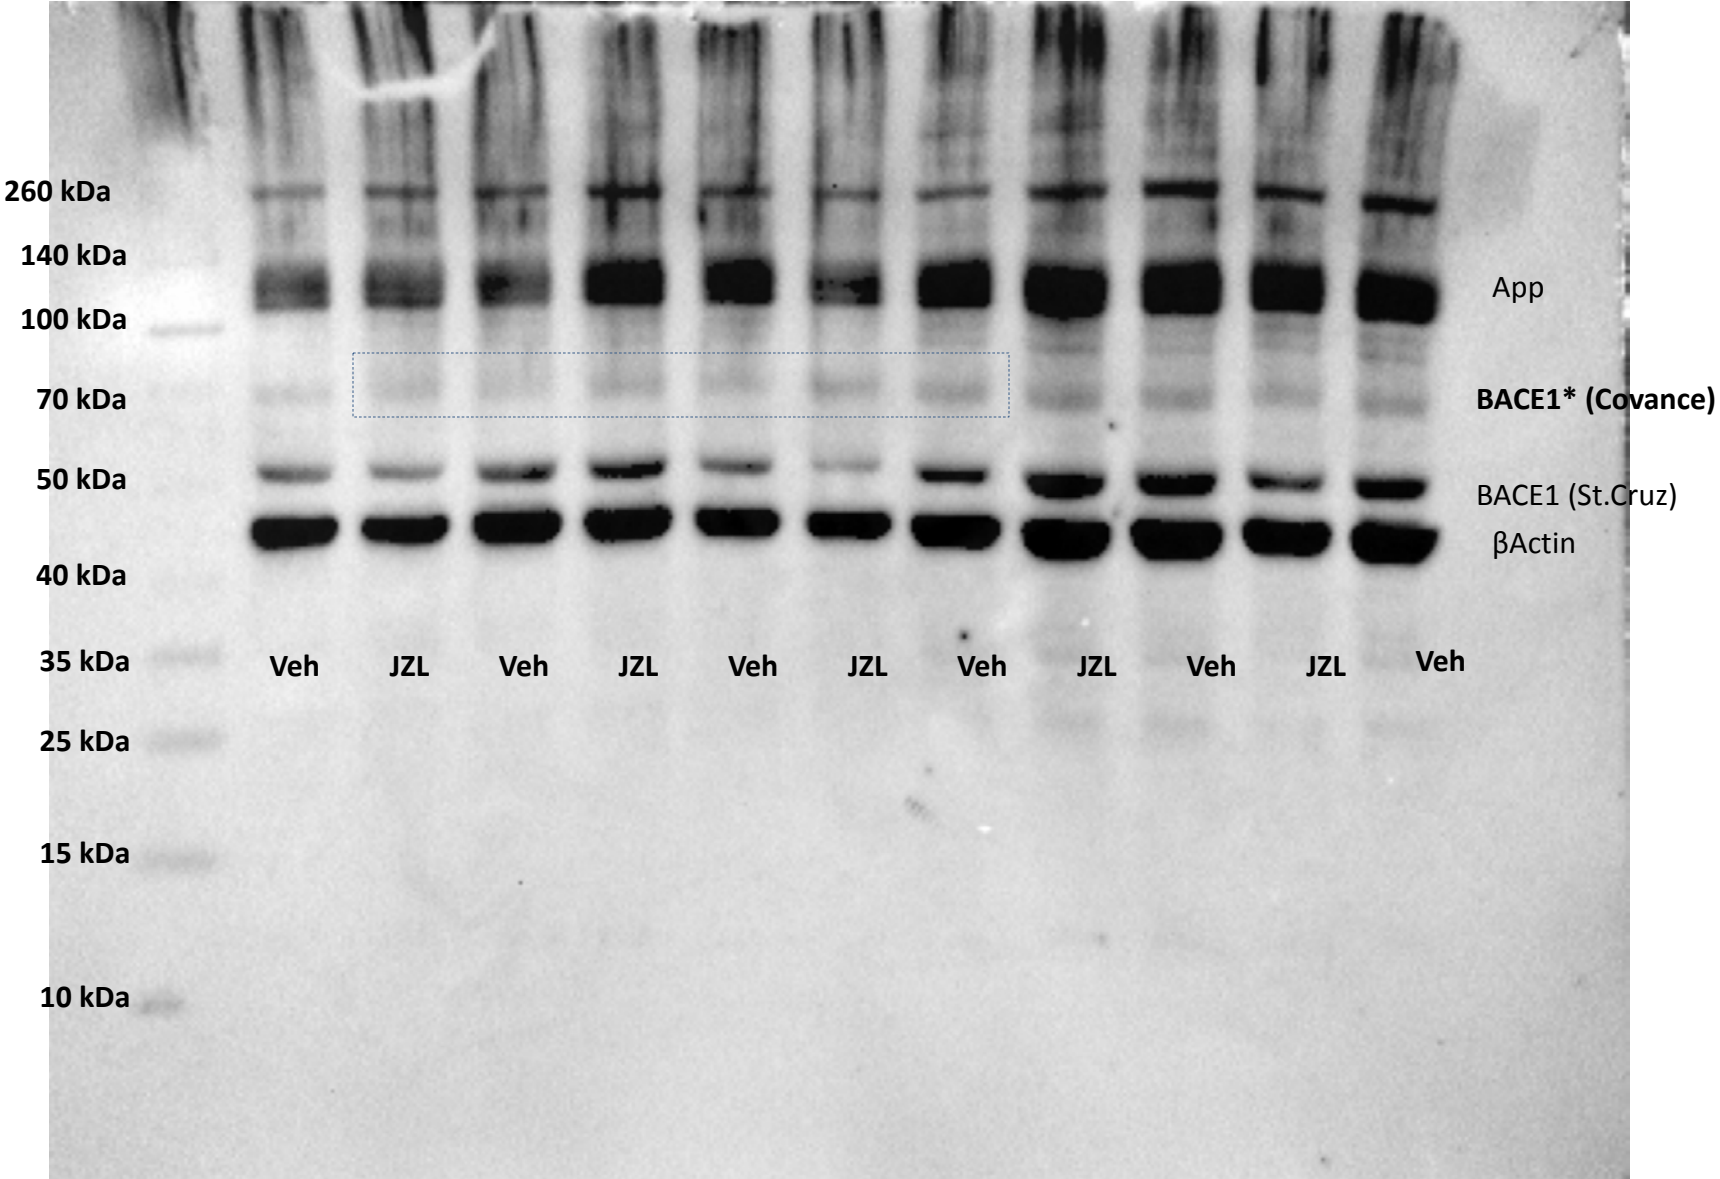

Supplement: pone.0114521.s002.pdf [file pone.0114521.s002.pdf]
